# Supplementary material
Source: ML conference proceedings conference paper supplement (https://proceedings.neurips.cc/paper_files/paper/2020/hash/02f657d55eaf1c4840ce8d66fcdaf90c-Abstract.html)
Supplement: Supplementary file [file 02f657d55eaf1c4840ce8d66fcdaf90c-Supplemental.pdf]

## Appendices

### A Auxiliary lemmas

The proofs of Theorem [1](#) and Theorem [2](#) require the lemmas provided below.

**Lemma 1.** The norms  $\|\cdot\|_{\infty,1}$  and  $\|\cdot\|_{1,\infty}$  are dual.

*Proof.* The dual norm of  $\|\cdot\|_{\infty,1}$  assigns each  $\mathbf{w} \in \mathbb{R}^{|\mathcal{I}||\mathcal{J}|}$  for finite sets  $\mathcal{I}$  and  $\mathcal{J}$ , the real number

$$\sup_{\mathbf{v}: \|\mathbf{v}\|_{\infty,1} \leq 1} \mathbf{w}^T \mathbf{v}.$$

We have that for  $\mathbf{v}$  with  $\|\mathbf{v}\|_{\infty,1} \leq 1$

$$\begin{aligned} \mathbf{w}^T \mathbf{v} &= \sum_{i \in \mathcal{I}} \sum_{j \in \mathcal{J}} w_{(i,j)} v_{(i,j)} \leq \sum_{i \in \mathcal{I}} \sum_{j \in \mathcal{J}} |w_{(i,j)}| |v_{(i,j)}| \\ &\leq \sum_{i \in \mathcal{I}} \left( \max_j |v_{(i,j)}| \right) \sum_{j \in \mathcal{J}} |w_{(i,j)}| \leq \max_{i \in \mathcal{I}} \sum_{j \in \mathcal{J}} |w_{(i,j)}| \sum_{i \in \mathcal{I}} \left( \max_j |v_{(i,j)}| \right) \\ &= \|\mathbf{w}\|_{1,\infty} \|\mathbf{v}\|_{\infty,1} \leq \|\mathbf{w}\|_{1,\infty} \end{aligned}$$

So, to prove the result we just need to find a vector  $\mathbf{u}$  such that  $\|\mathbf{u}\|_{\infty,1} \leq 1$  and  $\mathbf{w}^T \mathbf{u} = \|\mathbf{w}\|_{1,\infty}$ . Let  $\iota \in \arg \max_{i \in \mathcal{I}} \sum_{j \in \mathcal{J}} |w_{(i,j)}|$ , then  $\mathbf{u}$  given by

$$u_{(i,j)} = \begin{cases} 1 & \text{if } i = \iota \text{ and } w_{(i,j)} \geq 0 \\ -1 & \text{if } i = \iota \text{ and } w_{(i,j)} < 0 \\ 0 & \text{otherwise} \end{cases}$$

satisfies  $\|\mathbf{u}\|_{\infty,1} \leq 1$  and  $\mathbf{w}^T \mathbf{u} = \|\mathbf{w}\|_{1,\infty}$ . □

**Lemma 2.** Let  $\mathbf{u} \in \mathbb{R}^{|\mathcal{I}||\mathcal{J}|}$  for finite sets  $\mathcal{I}$  and  $\mathcal{J}$ , and  $f_1, f_2$  be the functions  $f_1(\mathbf{v}) = \|\mathbf{v}\|_{\infty,1} - \mathbf{1}^T \mathbf{v} + I_+(\mathbf{v})$  and  $f_2(\mathbf{v}) = \mathbf{v}^T \mathbf{u} + I_+(\mathbf{v})$  for  $\mathbf{v} \in \mathbb{R}^{|\mathcal{I}||\mathcal{J}|}$ , where

$$I_+(\mathbf{v}) = \begin{cases} 0 & \text{if } \mathbf{v} \succeq \mathbf{0} \\ \infty & \text{otherwise} \end{cases}.$$

Then, their conjugate functions are

$$\begin{aligned} f_1^*(\mathbf{w}) &= \begin{cases} 0 & \text{if } \|(\mathbf{1} + \mathbf{w})_+\|_{1,\infty} \leq 1 \\ \infty & \text{otherwise} \end{cases} \\ f_2^*(\mathbf{w}) &= \begin{cases} 0 & \text{if } \mathbf{w} \preceq \mathbf{u} \\ \infty & \text{otherwise} \end{cases}. \end{aligned}$$

*Proof.* By definition of conjugate function we have

$$f_1^*(\mathbf{w}) = \sup_{\mathbf{v}} (\mathbf{w}^T \mathbf{v} - \|\mathbf{v}\|_{\infty,1} + \mathbf{1}^T \mathbf{v} - I_+(\mathbf{v})) = \sup_{\mathbf{v} \succeq \mathbf{0}} ((\mathbf{1} + \mathbf{w})^T \mathbf{v} - \|\mathbf{v}\|_{\infty,1}).$$

- If  $\|(\mathbf{1} + \mathbf{w})_+\|_{1,\infty} \leq 1$ , for each  $\mathbf{v} \succeq \mathbf{0}$ ,  $\mathbf{v} \neq \mathbf{0}$  we have

$$(\mathbf{1} + \mathbf{w})^T \mathbf{v} \leq ((\mathbf{1} + \mathbf{w})_+)^T \mathbf{v} = \|\mathbf{v}\|_{\infty,1} \left( ((\mathbf{1} + \mathbf{w})_+)^T \frac{\mathbf{v}}{\|\mathbf{v}\|_{\infty,1}} \right)$$

and by definition of dual norm we get

$$(\mathbf{1} + \mathbf{w})^T \mathbf{v} \leq \|\mathbf{v}\|_{\infty,1} \|(\mathbf{1} + \mathbf{w})_+\|_{1,\infty} \leq \|\mathbf{v}\|_{\infty,1}$$

which implies

$$(\mathbf{1} + \mathbf{w})^T \mathbf{v} - \|\mathbf{v}\|_{\infty,1} \leq 0.$$

Moreover,  $(\mathbf{1} + \mathbf{w})^T \mathbf{0} - \|\mathbf{0}\|_{\infty,1} = 0$ , so we have that  $f_1^*(\mathbf{w}) = 0$ .

- If  $\|(\mathbf{1} + \mathbf{w})_+\|_{1,\infty} > 1$ , by definition of dual norm and using Lemma 1 there exists  $\mathbf{u}$  such that  $((\mathbf{1} + \mathbf{w})_+)^T \mathbf{u} > 1$  and  $\|\mathbf{u}\|_{\infty,1} \leq 1$ . Define  $\tilde{\mathbf{u}}$  as

$$\tilde{u}_{(i,j)} = \begin{cases} u_{(i,j)} & \text{if } u_{(i,j)} \geq 0 \text{ and } 1 + w_{(i,j)} \geq 0 \\ 0 & \text{if } u_{(i,j)} < 0 \text{ or } 1 + w_{(i,j)} < 0 \end{cases}$$

By definition of  $\tilde{\mathbf{u}}$  and  $\|\cdot\|_{\infty,1}$  we have

$$\|\tilde{\mathbf{u}}\|_{\infty,1} \leq \|\mathbf{u}\|_{\infty,1} \leq 1$$

and

$$(\mathbf{1} + \mathbf{w})^T \tilde{\mathbf{u}} = ((\mathbf{1} + \mathbf{w})_+)^T \tilde{\mathbf{u}} \geq ((\mathbf{1} + \mathbf{w})_+)^T \mathbf{u} > 1.$$

Now let  $t > 0$  and take  $\mathbf{v} = t\tilde{\mathbf{u}} \succeq \mathbf{0}$ , then we have

$$(\mathbf{1} + \mathbf{w})^T \mathbf{v} - \|\mathbf{v}\|_{\infty,1} = t((\mathbf{1} + \mathbf{w})^T \tilde{\mathbf{u}} - \|\tilde{\mathbf{u}}\|_{\infty,1})$$

which tends to infinity as  $t \rightarrow +\infty$  because  $(\mathbf{1} + \mathbf{w})^T \tilde{\mathbf{u}} - \|\tilde{\mathbf{u}}\|_{\infty,1} > 0$ , so we have that  $f_1^*(\mathbf{w}) = +\infty$ .

Finally, the expression for  $f_2^*$  is straightforward since

$$f_2^*(\mathbf{w}) = \sup_{\mathbf{v} \succeq \mathbf{0}} ((\mathbf{w} - \mathbf{u})^T \mathbf{v}).$$

□

## B Proof of Theorem 1

Let set  $\tilde{\mathcal{U}}$  and function  $\tilde{\ell}(\mathbf{h}, \mathbf{p})$  be given by

$$\tilde{\mathcal{U}} = \{\mathbf{p} : \mathcal{X} \times \mathcal{Y} \rightarrow \mathbb{R} \text{ s.t. } \mathbf{p} \succeq \mathbf{0}, \|\mathbf{p}\|_{1,\infty} \leq 1\}$$

$$\tilde{\ell}(\mathbf{h}, \mathbf{p}) = \mathbf{b}^T \boldsymbol{\mu}_b^* - \mathbf{a}^T \boldsymbol{\mu}_a^* - \nu^* + \mathbf{p}^T (\boldsymbol{\Phi}(\boldsymbol{\mu}_a^* - \boldsymbol{\mu}_b^*) + (\nu^* + 1)\mathbf{1} - \mathbf{h}).$$

In the first step of the proof we show that  $\mathbf{h}^{\mathbf{a},\mathbf{b}}$  satisfying (4) is a solution of optimization problem  $\min_{\mathbf{h} \in T(\mathcal{X}, \mathcal{Y})} \max_{\mathbf{p} \in \tilde{\mathcal{U}}} \tilde{\ell}(\mathbf{h}, \mathbf{p})$ , and in the second step of the proof we show that a solution of  $\min_{\mathbf{h} \in T(\mathcal{X}, \mathcal{Y})} \max_{\mathbf{p} \in \tilde{\mathcal{U}}} \tilde{\ell}(\mathbf{h}, \mathbf{p})$  is also a solution of  $\min_{\mathbf{h} \in T(\mathcal{X}, \mathcal{Y})} \max_{\mathbf{p} \in \mathcal{U}^{\mathbf{a},\mathbf{b}}} \ell(\mathbf{h}, \mathbf{p})$ .

For the first step, note that

$$\tilde{\ell}(\mathbf{h}, \mathbf{p}) = \mathbf{b}^T \boldsymbol{\mu}_b^* - \mathbf{a}^T \boldsymbol{\mu}_a^* - \nu^* + \sum_{x \in \mathcal{X}} \mathbf{p}_x^T (\boldsymbol{\Phi}_x(\boldsymbol{\mu}_a^* - \boldsymbol{\mu}_b^*) + (\nu^* + 1)\mathbf{1} - \mathbf{h}_x).$$

Then, optimization problem  $\min_{\mathbf{h} \in T(\mathcal{X}, \mathcal{Y})} \max_{\mathbf{p} \in \tilde{\mathcal{U}}} \tilde{\ell}(\mathbf{h}, \mathbf{p})$  is equivalent to

$$\min_{\mathbf{h}_x \in \Delta(\mathcal{Y}) \forall x \in \mathcal{X}} \max_{\mathbf{p}_x \succeq \mathbf{0}, \|\mathbf{p}_x\|_1 \leq 1 \forall x \in \mathcal{X}} \sum_{x \in \mathcal{X}} \mathbf{p}_x^T (\boldsymbol{\Phi}_x(\boldsymbol{\mu}_a^* - \boldsymbol{\mu}_b^*) + (\nu^* + 1)\mathbf{1} - \mathbf{h}_x)$$

that is separable and has solution given by

$$\mathbf{h}_x^{\mathbf{a},\mathbf{b}} \in \arg \min_{\mathbf{h}_x \in \Delta(\mathcal{Y})} \max_{\mathbf{p}_x \succeq \mathbf{0}, \|\mathbf{p}_x\|_1 \leq 1} \mathbf{p}_x^T (\boldsymbol{\Phi}_x(\boldsymbol{\mu}_a^* - \boldsymbol{\mu}_b^*) + (\nu^* + 1)\mathbf{1} - \mathbf{h}_x)$$

for each  $x \in \mathcal{X}$ . The inner maximization above is given in closed-form by

$$\begin{aligned} & \max_{\mathbf{p}_x \succeq \mathbf{0}, \|\mathbf{p}_x\|_1 \leq 1} \mathbf{p}_x^T (\boldsymbol{\Phi}_x(\boldsymbol{\mu}_a^* - \boldsymbol{\mu}_b^*) + (\nu^* + 1)\mathbf{1} - \mathbf{h}_x) \\ & = \|(\boldsymbol{\Phi}_x(\boldsymbol{\mu}_a^* - \boldsymbol{\mu}_b^*) + (\nu^* + 1)\mathbf{1} - \mathbf{h}_x)_+\|_{\infty} \geq 0 \end{aligned}$$

that takes its minimum value 0 for any  $\mathbf{h}_x^{\mathbf{a},\mathbf{b}} \succeq \boldsymbol{\Phi}_x(\boldsymbol{\mu}_a^* - \boldsymbol{\mu}_b^*) + (\nu^* + 1)\mathbf{1}$ .

For the second step, if  $\mathbf{h}^{\mathbf{a},\mathbf{b}}$  is a solution of  $\min_{\mathbf{h} \in T(\mathcal{X}, \mathcal{Y})} \max_{\mathbf{p} \in \tilde{\mathcal{U}}} \tilde{\ell}(\mathbf{h}, \mathbf{p})$  we have that

$$\min_{\mathbf{h} \in T(\mathcal{X}, \mathcal{Y})} \max_{\mathbf{p} \in \tilde{\mathcal{U}}} \tilde{\ell}(\mathbf{h}, \mathbf{p}) = \max_{\mathbf{p} \in \tilde{\mathcal{U}}} \tilde{\ell}(\mathbf{h}^{\mathbf{a},\mathbf{b}}, \mathbf{p}) \geq \max_{\mathbf{p} \in \mathcal{U}^{\mathbf{a},\mathbf{b}}} \ell(\mathbf{h}^{\mathbf{a},\mathbf{b}}, \mathbf{p}) \geq \min_{\mathbf{h} \in T(\mathcal{X}, \mathcal{Y})} \max_{\mathbf{p} \in \mathcal{U}^{\mathbf{a},\mathbf{b}}} \ell(\mathbf{h}, \mathbf{p}) \quad (16)$$

where the first inequality is due to the fact that  $\mathcal{U}^{a,b} \subset \tilde{\mathcal{U}}$  and  $\tilde{\ell}(h, p) \geq \ell(h, p)$  for  $p \in \mathcal{U}^{a,b}$  because

$$\mathbf{b}^T \boldsymbol{\mu}_b^* - \mathbf{a}^T \boldsymbol{\mu}_a^* + \mathbf{p}^T \Phi(\boldsymbol{\mu}_a^* - \boldsymbol{\mu}_b^*) \leq 0$$

by definition of  $\mathcal{U}^{a,b}$  and since  $\boldsymbol{\mu}_a^*, \boldsymbol{\mu}_b^* \succeq \mathbf{0}$ .

Since  $\ell(h, p)$  is continuous and convex-concave, and both  $\mathcal{U}^{a,b}$  and  $T(\mathcal{X}, \mathcal{Y})$  are convex and compact, the min and the max in  $R^{a,b} = \min_{h \in T(\mathcal{X}, \mathcal{Y})} \max_{p \in \mathcal{U}^{a,b}} \ell(h, p)$  can be interchanged (see e.g., [14]) and we have that  $R^{a,b} = \max_{p \in \mathcal{U}^{a,b}} \min_{h \in T(\mathcal{X}, \mathcal{Y})} \ell(h, p)$ . In addition,

$$\min_{h \in T(\mathcal{X}, \mathcal{Y})} \ell(h, p) = \min_{h \in T(\mathcal{X}, \mathcal{Y})} \mathbf{p}^T (\mathbf{1} - h) = \mathbf{p}^T \mathbf{1} - \|\mathbf{p}\|_{\infty, 1}$$

because the optimization problem above is separable for  $x \in \mathcal{X}$  and

$$\max_{h_x \in \Delta(\mathcal{Y})} \mathbf{p}_x^T h_x = \|\mathbf{p}_x\|_{\infty}. \quad (17)$$

Then  $R^{a,b} = \max_{p \in \mathcal{U}^{a,b}} \mathbf{p}^T \mathbf{1} - \|\mathbf{p}\|_{\infty, 1}$  that can be written as

$$\begin{aligned} \max_{\mathbf{p}} \quad & \mathbf{p}^T \mathbf{1} - \|\mathbf{p}\|_{\infty, 1} - I_+(\mathbf{p}) \\ \text{s. t.} \quad & -\mathbf{p}^T \mathbf{1} = -1 \\ & \mathbf{a} \preceq \Phi^T \mathbf{p} \preceq \mathbf{b} \end{aligned} \quad (18)$$

where

$$I_+(\mathbf{p}) = \begin{cases} 0 & \text{if } \mathbf{p} \succeq \mathbf{0} \\ \infty & \text{otherwise} \end{cases}$$

The Lagrange dual of the optimization problem (18) is

$$\begin{aligned} \min_{\boldsymbol{\mu}_a, \boldsymbol{\mu}_b \in \mathbb{R}^m, \nu \in \mathbb{R}} \quad & \mathbf{b}^T \boldsymbol{\mu}_b - \mathbf{a}^T \boldsymbol{\mu}_a - \nu + f^*(\Phi(\boldsymbol{\mu}_a - \boldsymbol{\mu}_b) + \nu \mathbf{1}) \\ \text{s. t.} \quad & \boldsymbol{\mu}_a \succeq \mathbf{0}, \boldsymbol{\mu}_b \succeq \mathbf{0} \end{aligned} \quad (19)$$

where  $f^*$  is the conjugate function of  $f(\mathbf{p}) = \|\mathbf{p}\|_{\infty, 1} - \mathbf{p}^T \mathbf{1} + I_+(\mathbf{p})$  (see e.g., section 5.1.6 in [15]). Then, optimization problem (19) becomes (3) using the Lemma 2 above.

Strong duality holds between optimization problems (18) and (3) since constraints in (18) are affine. Then, if  $\boldsymbol{\mu}_a^*, \boldsymbol{\mu}_b^*, \nu^*$  is a solution of (3) we have that  $R^{a,b}$  is equal to the value of

$$\max_{\mathbf{p}} \mathbf{p}^T \mathbf{1} - \|\mathbf{p}\|_{\infty, 1} - I_+(\mathbf{p}) - (\mathbf{p}^T \Phi - \mathbf{b}^T) \boldsymbol{\mu}_b^* + (\mathbf{p}^T \Phi - \mathbf{a}^T) \boldsymbol{\mu}_a^* + (\mathbf{p}^T \mathbf{1} - 1) \nu^* \quad (20)$$

that equals

$$\max_{p \in \tilde{\mathcal{U}}} \mathbf{p}^T \mathbf{1} - \|\mathbf{p}\|_{\infty, 1} + \mathbf{b}^T \boldsymbol{\mu}_b^* - \mathbf{a}^T \boldsymbol{\mu}_a^* - \nu^* + \mathbf{p}^T (\Phi(\boldsymbol{\mu}_a^* - \boldsymbol{\mu}_b^*) + \nu^* \mathbf{1})$$

since a solution of the primal problem (18) belongs to  $\tilde{\mathcal{U}}$  and is also a solution of (20). Therefore,

$$\begin{aligned} R^{a,b} &= \max_{p \in \tilde{\mathcal{U}}} \min_{h \in T(\mathcal{X}, \mathcal{Y})} \ell(h, p) + \mathbf{b}^T \boldsymbol{\mu}_b^* - \mathbf{a}^T \boldsymbol{\mu}_a^* - \nu^* + \mathbf{p}^T (\Phi(\boldsymbol{\mu}_a^* - \boldsymbol{\mu}_b^*) + \nu^* \mathbf{1}) \\ &= \max_{p \in \tilde{\mathcal{U}}} \min_{h \in T(\mathcal{X}, \mathcal{Y})} \tilde{\ell}(h, p) = \min_{h \in T(\mathcal{X}, \mathcal{Y})} \max_{p \in \tilde{\mathcal{U}}} \tilde{\ell}(h, p) \end{aligned}$$

where the last equality is due to the fact that  $\tilde{\ell}(h, p)$  is continuous and convex-concave, and both  $\tilde{\mathcal{U}}$  and  $T(\mathcal{X}, \mathcal{Y})$  are convex and compact. Then, inequalities in (16) are in fact equalities and  $h^{a,b}$  is solution of  $\min_{h \in T(\mathcal{X}, \mathcal{Y})} \max_{p \in \mathcal{U}^{a,b}} \ell(h, p)$ .

## C Proof of Theorem 2

The result is a direct consequence of the fact that for any  $p \in \mathcal{U}^{a,b}$

$$\min_{\tilde{p} \in \mathcal{U}^{a,b}} \ell(h, \tilde{p}) \leq \ell(h, p) \leq \max_{\tilde{p} \in \mathcal{U}^{a,b}} \ell(h, \tilde{p})$$

and

$$\begin{aligned}\min_{\tilde{\mathbf{p}} \in \mathcal{U}^{\mathbf{a}, \mathbf{b}}} \ell(\mathbf{h}, \tilde{\mathbf{p}}) &= \min_{\tilde{\mathbf{p}} \in \mathcal{U}^{\mathbf{a}, \mathbf{b}}} \tilde{\mathbf{p}}^{\mathbf{T}}(\mathbf{1} - \mathbf{h}) \\ \max_{\tilde{\mathbf{p}} \in \mathcal{U}^{\mathbf{a}, \mathbf{b}}} \ell(\mathbf{h}, \tilde{\mathbf{p}}) &= - \min_{\tilde{\mathbf{p}} \in \mathcal{U}^{\mathbf{a}, \mathbf{b}}} \tilde{\mathbf{p}}^{\mathbf{T}}(\mathbf{h} - \mathbf{1}).\end{aligned}$$

The expression for  $\kappa^{\mathbf{a}, \mathbf{b}}(q)$  in (7) is obtained since

$$\begin{aligned}\min_{\tilde{\mathbf{p}} \in \mathcal{U}^{\mathbf{a}, \mathbf{b}}} \tilde{\mathbf{p}}^{\mathbf{T}}(-\mathbf{q}) &= \min_{\tilde{\mathbf{p}}} \tilde{\mathbf{p}}^{\mathbf{T}}(-\mathbf{q}) + I_+(\tilde{\mathbf{p}}) \\ \text{s. t.} \quad & -\mathbf{1}^{\mathbf{T}}\tilde{\mathbf{p}} = -1 \\ & \mathbf{a} \preceq \Phi^{\mathbf{T}}\tilde{\mathbf{p}} \preceq \mathbf{b}\end{aligned}\tag{21}$$

where

$$I_+(\tilde{\mathbf{p}}) = \begin{cases} 0 & \text{if } \tilde{\mathbf{p}} \succeq \mathbf{0} \\ \infty & \text{otherwise} \end{cases}$$

Then, the Lagrange dual of the optimization problem (21) is

$$\begin{aligned}\max_{\boldsymbol{\mu}_a, \boldsymbol{\mu}_b \in \mathbb{R}^m, \nu \in \mathbb{R}} \quad & \mathbf{a}^{\mathbf{T}}\boldsymbol{\mu}_a - \mathbf{b}^{\mathbf{T}}\boldsymbol{\mu}_b + \nu - f^*(\Phi(\boldsymbol{\mu}_a - \boldsymbol{\mu}_b) + \nu\mathbf{1}) \\ \text{s. t.} \quad & \boldsymbol{\mu}_a \succeq \mathbf{0}, \boldsymbol{\mu}_b \succeq \mathbf{0}\end{aligned}\tag{22}$$

where  $f^*$  is the conjugate function of  $f(\tilde{\mathbf{p}}) = \tilde{\mathbf{p}}^{\mathbf{T}}(-\mathbf{q}) + I_+(\tilde{\mathbf{p}})$  that leads to (7) using Lemma 2

## D Proof of Theorem 3

Firstly, with probability at least  $1 - \delta$  we have that  $\mathbf{p}^* \in \mathcal{U}^{\mathbf{a}_n, \mathbf{b}_n}$  and

$$\|\boldsymbol{\tau}_\infty - \boldsymbol{\tau}_n\|_2 \leq \|\mathbf{d}\|_2 \sqrt{\frac{\log m + \log \frac{2}{\delta}}{2n}}$$

because, using Hoeffding's inequality [19] we have that for  $i = 1, 2, \dots, m$

$$\mathbb{P} \{ |\tau_{\infty, i} - \tau_{n, i}| < t_i \} \geq 1 - 2 \exp \left\{ -\frac{2n^2 t_i^2}{nd_i^2} \right\}$$

so taking  $t_i = d_i \sqrt{\frac{\log m + \log \frac{2}{\delta}}{2n}}$  we get

$$\mathbb{P} \left\{ |\tau_{\infty, i} - \tau_{n, i}| < d_i \sqrt{\frac{\log m + \log \frac{2}{\delta}}{2n}} \right\} \geq 1 - 2 \exp \left\{ -\log m - \log \frac{2}{\delta} \right\} = 1 - \frac{\delta}{m}$$

and using the union bound we have that

$$\begin{aligned}\mathbb{P} \left\{ |\tau_{\infty, i} - \tau_{n, i}| < d_i \sqrt{\frac{\log m + \log \frac{2}{\delta}}{2n}}, i = 1, 2, \dots, m \right\} \\ \geq 1 - m + \sum_{i=1}^m \mathbb{P} \left\{ |\tau_{\infty, i} - \tau_{n, i}| < d_i \sqrt{\frac{\log m + \log \frac{2}{\delta}}{2n}} \right\} \\ \geq 1 - \delta.\end{aligned}$$

For the first inequality in (9), we have that  $R(\mathbf{h}^{\mathbf{a}_n, \mathbf{b}_n}) \leq R^{\mathbf{a}_n, \mathbf{b}_n}$  with probability at least  $1 - \delta$  since  $\mathbf{p}^* \in \mathcal{U}^{\mathbf{a}_n, \mathbf{b}_n}$  with probability at least  $1 - \delta$ .

For the second inequality in (9), let  $\boldsymbol{\mu}^*, \nu^*$  be the solution with minimum euclidean norm of (6) for  $\mathbf{a} = \boldsymbol{\tau}_\infty$ ;  $[(\boldsymbol{\mu}^*)^+, (-\boldsymbol{\mu}^*)^+, \nu^*]$  is a feasible point of (3) because  $\boldsymbol{\mu}^* = (\boldsymbol{\mu}^*)^+ - (-\boldsymbol{\mu}^*)^+$  and  $\boldsymbol{\mu}^*, \nu^*$  is a feasible point of (6). Hence

$$R^{\mathbf{a}_n, \mathbf{b}_n} \leq \mathbf{b}_n^{\mathbf{T}}(-\boldsymbol{\mu}^*)^+ - \mathbf{a}_n^{\mathbf{T}}(\boldsymbol{\mu}^*)^+ - \nu^* = R\boldsymbol{\tau}_\infty + (\mathbf{b}_n - \boldsymbol{\tau}_\infty)^{\mathbf{T}}(-\boldsymbol{\mu}^*)^+ + (\boldsymbol{\tau}_\infty - \mathbf{a}_n)^{\mathbf{T}}(\boldsymbol{\mu}^*)^+$$

$$\begin{aligned}
&= R^{\tau_\infty} - \left( \tau_\infty - \tau_n - \mathbf{d} \sqrt{\frac{\log m + \log \frac{2}{\delta}}{2n}} \right)^\top (-\boldsymbol{\mu}^*)^+ + \left( \tau_\infty - \tau_n + \mathbf{d} \sqrt{\frac{\log m + \log \frac{2}{\delta}}{2n}} \right)^\top (\boldsymbol{\mu}^*)^+ \\
&= R^{\tau_\infty} + (\tau_n - \tau_\infty)^\top \boldsymbol{\mu}^* + \sqrt{\frac{\log m + \log \frac{2}{\delta}}{2n}} \mathbf{d}^\top ((\boldsymbol{\mu}^*)^+ + (-\boldsymbol{\mu}^*)^+)
\end{aligned}$$

Then the result is obtained using Cauchy-Schwarz inequality and the fact that  $\|(\boldsymbol{\mu}^*)^+ + (-\boldsymbol{\mu}^*)^+\|_2 = \|\boldsymbol{\mu}^*\|_2$ .

For the result in (I0), note that using Theorem 2 and since  $\mathbf{p}^* \in \mathcal{U}^{\mathbf{a}_n, \mathbf{b}_n}$  with probability at least  $1 - \delta$  we have that

$$R(\mathbf{h}^{\tau_n}) \leq \max_{\mathbf{p} \in \mathcal{U}^{\mathbf{a}_n, \mathbf{b}_n}} \ell(\mathbf{h}^{\tau_n}, \mathbf{p}) = \min_{\Phi(\boldsymbol{\mu}_a - \boldsymbol{\mu}_a) + \nu \mathbf{1} \preceq \mathbf{h}^{\tau_n} - \mathbf{1}} \mathbf{b}_n^\top \boldsymbol{\mu}_b - \mathbf{a}_n^\top \boldsymbol{\mu}_a - \nu$$

so that, if  $\boldsymbol{\mu}_n^*, \nu_n^*$  is the solution with minimum euclidean norm of (6) for  $\mathbf{a} = \tau_n$ , we have that  $R(\mathbf{h}^{\tau_n}) \leq \mathbf{b}_n^\top (-\boldsymbol{\mu}_n^*)^+ - \mathbf{a}_n^\top (\boldsymbol{\mu}_n^*)^+ - \nu_n^*$  because  $\boldsymbol{\mu}_n^* = (\boldsymbol{\mu}_n^*)^+ - (-\boldsymbol{\mu}_n^*)^+$  and  $\Phi \boldsymbol{\mu}_n^* + \nu_n^* \mathbf{1} \preceq \mathbf{h}^{\tau_n} - \mathbf{1}$  by definition of  $\mathbf{h}^{\tau_n}$ . Therefore, the result is obtained since

$$\begin{aligned}
R(\mathbf{h}^{\tau_n}) &\leq \left( \tau_n + \mathbf{d} \sqrt{\frac{\log m + \log \frac{2}{\delta}}{2n}} \right)^\top (-\boldsymbol{\mu}_n^*)^+ - \left( \tau_n - \mathbf{d} \sqrt{\frac{\log m + \log \frac{2}{\delta}}{2n}} \right)^\top (\boldsymbol{\mu}_n^*)^+ - \nu_n^* \\
&= R^{\tau_n} + \mathbf{d}^\top \sqrt{\frac{\log m + \log \frac{2}{\delta}}{2n}} ((\boldsymbol{\mu}_n^*)^+ + (-\boldsymbol{\mu}_n^*)^+).
\end{aligned}$$

For the result in (I1), note that using Theorem 2 and since  $\mathbf{p}^* \in \mathcal{U}^{\tau_\infty}$  we have that

$$R(\mathbf{h}^{\tau_n}) \leq \max_{\mathbf{p} \in \mathcal{U}^{\tau_\infty}} \ell(\mathbf{h}^{\tau_n}, \mathbf{p}) = \min_{\Phi \boldsymbol{\mu} + \nu \mathbf{1} \preceq \mathbf{h}^{\tau_n} - \mathbf{1}} -(\tau_\infty)^\top \boldsymbol{\mu} - \nu$$

so that, if  $\boldsymbol{\mu}_n^*, \nu_n^*$  is the solution with minimum euclidean norm of (6) for  $\mathbf{a} = \tau_n$ , we have that  $R(\mathbf{h}^{\tau_n}) \leq -(\tau_\infty)^\top \boldsymbol{\mu}_n^* - \nu_n^*$  because  $\Phi \boldsymbol{\mu}_n^* + \nu_n^* \mathbf{1} \preceq \mathbf{h}^{\tau_n} - \mathbf{1}$  by definition of  $\mathbf{h}^{\tau_n}$ . Let  $\boldsymbol{\mu}^*, \nu^*$  be the solution with minimum euclidean norm of (6) for  $\mathbf{a} = \tau_\infty$ , the result is obtained since

$$\begin{aligned}
R(\mathbf{h}^{\tau_n}) &\leq -(\tau_\infty)^\top \boldsymbol{\mu}_n^* - \nu_n^* + \tau_n^\top \boldsymbol{\mu}_n^* - \tau_n^\top \boldsymbol{\mu}_n^* + (\tau_\infty)^\top \boldsymbol{\mu}^* + \nu^* - (\tau_\infty)^\top \boldsymbol{\mu}^* - \nu^* \\
&= (\tau_n - \tau_\infty)^\top \boldsymbol{\mu}_n^* + R^{\tau_\infty} - \tau_n^\top \boldsymbol{\mu}_n^* - \nu_n^* + (\tau_\infty)^\top \boldsymbol{\mu}^* + \nu^* \\
&\leq (\tau_n - \tau_\infty)^\top \boldsymbol{\mu}_n^* + (\tau_\infty - \tau_n)^\top \boldsymbol{\mu}^* + R^{\tau_\infty} \\
&\leq \|\tau_n - \tau_\infty\|_2 \|\boldsymbol{\mu}_n^* - \boldsymbol{\mu}^*\|_2 + R^{\tau_\infty}
\end{aligned} \tag{23}$$

where (23) is due to the fact that  $-\tau_n^\top \boldsymbol{\mu}_n^* - \nu_n^* \leq -\tau_n^\top \boldsymbol{\mu}^* - \nu^*$  since  $\boldsymbol{\mu}^*, \nu^*$  is a feasible point of (6) for  $\mathbf{a} = \tau_n$ .
